# Supplementary material for: Circularly polarized luminescence activity in the near infrared spectral region of a water-soluble ytterbium(iii) complex containing a conjugated chromophoric ligand
Source: Royal Society of Chemistry journal article supplement (doi:10.1039/d4nj00550c), 2024-01-01
Supplement: d4nj00550c1.pdf [file d4nj00550c1.pdf]

## **Circularly polarized Luminescence activity in the Near Infrared spectral region from a water-soluble Ytterbium(III) complex containing a conjugated chromophoric ligand**

Silvia Mizzoni,<sup>a,b</sup> Annika Sickinger,<sup>b</sup> Silvia Ruggieri,<sup>a</sup> François Riobé,<sup>b</sup> Laure Guy,<sup>b</sup> Olivier Maury,<sup>\*b</sup> Bruno Baguenard,<sup>c</sup> Amina Bensalah-Ledoux,<sup>c</sup> Yannick Guyot,<sup>c</sup> Stéphan Guy,<sup>c</sup> Martina Sanadar,<sup>d</sup> Andrea Melchior<sup>\*d</sup> and Fabio Piccinelli<sup>\*a</sup>

<sup>a</sup> Luminescent Materials Laboratory, DB, Università di Verona, and INSTM, UdR Verona, Strada Le Grazie 15, 37134 Verona, Italy. E-mail: [fabio.piccinelli@univr.it](mailto:fabio.piccinelli@univr.it)

<sup>b</sup> Univ Lyon, ENS de Lyon, CNRS UMR 5182, Laboratoire de Chimie, Lyon F-69342, France. E-mail: [olivier.maury@ens-lyon.fr](mailto:olivier.maury@ens-lyon.fr)

<sup>c</sup> Univ. Lyon, Institut Lumière Matière, UMR 5306 CNRS–Université Claude Bernard, 10 rue Ada Byron, Lyon 1, F-69622 Villeurbanne Cedex, France

<sup>d</sup> Dipartimento Politecnico di Ingegneria e Architettura, Laboratorio di Tecnologie Chimiche, Università di Udine, via Cotonificio 108, 33100 Udine, Italy. E-mail: [andrea.melchior@uniud.it](mailto:andrea.melchior@uniud.it)

# Electronic Supporting information

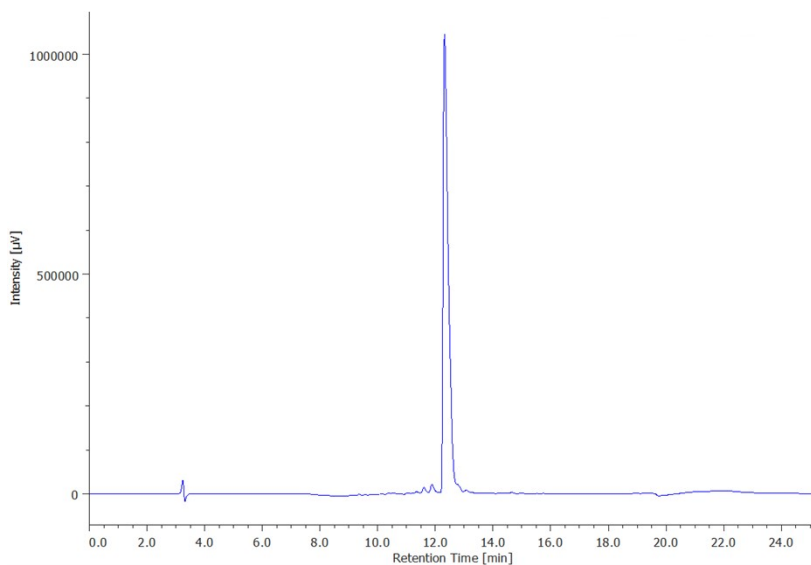

## CENTRE COMMUN DE SPECTROMETRIE DE MASSE

### Analysis Info

Analysis Name Impact2\_221007\_05\_SML-14.d  
 Method Tune\_pos\_Standard.m  
 Comment  
 Acquisition Date 10/7/2022 11:03:03 AM  
 Instrument / Set# impact II 1825265.1  
 0061

### Acquisition Parameter

|             |          |                       |            |                  |           |
|-------------|----------|-----------------------|------------|------------------|-----------|
| Source Type | ESI      | Ion Polarity          | Positive   | Set Nebulizer    | 0.3 Bar   |
| Focus       | Active   | Set Capillary         | 4500 V     | Set Dry Heater   | 200 °C    |
| Scan Begin  | 50 m/z   | Set End Plate Offset  | -500 V     | Set Dry Gas      | 4.0 l/min |
| Scan End    | 1500 m/z | Set Collision Cell RF | 1500.0 Vpp | Set Divert Valve | Source    |

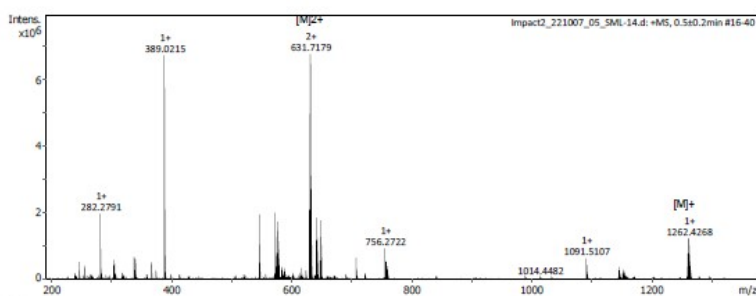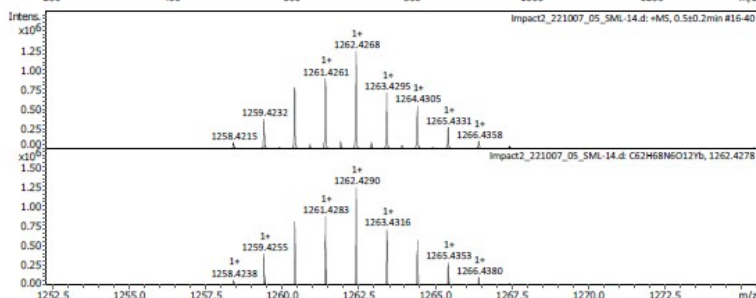

| Meas. m/z | Ion Formula   | m/z       | Sum Formula   | err [ppm] | mSigma | Adduct | z  |
|-----------|---------------|-----------|---------------|-----------|--------|--------|----|
| 1262.4268 | C62H68N6O12Yb | 1262.4278 | C62H68N6O12Yb | 1.7       | 12.2   | M      | 1+ |

CENTRE COMMUN DE SPECTROMETRIE DE MASSE

**Analysis Info**

Analysis Name Impact2\_221007\_06\_SML-29.d  
 Method Tune\_pos\_Standard.m  
 Comment  
 Acquisition Date 10/7/2022 11:07:16 AM  
 Instrument / Ser# impact II 1825265.1  
 0081

**Acquisition Parameter**

|             |          |                       |            |                  |           |
|-------------|----------|-----------------------|------------|------------------|-----------|
| Source Type | ESI      | Ion Polarity          | Positive   | Set Nebulizer    | 0.3 Bar   |
| Focus       | Active   | Set Capillary         | 4500 V     | Set Dry Heater   | 200 °C    |
| Scan Begin  | 50 m/z   | Set End Plate Offset  | -500 V     | Set Dry Gas      | 4.0 l/min |
| Scan End    | 1500 m/z | Set Collision Cell RF | 1500.0 Vpp | Set Divert Valve | Source    |

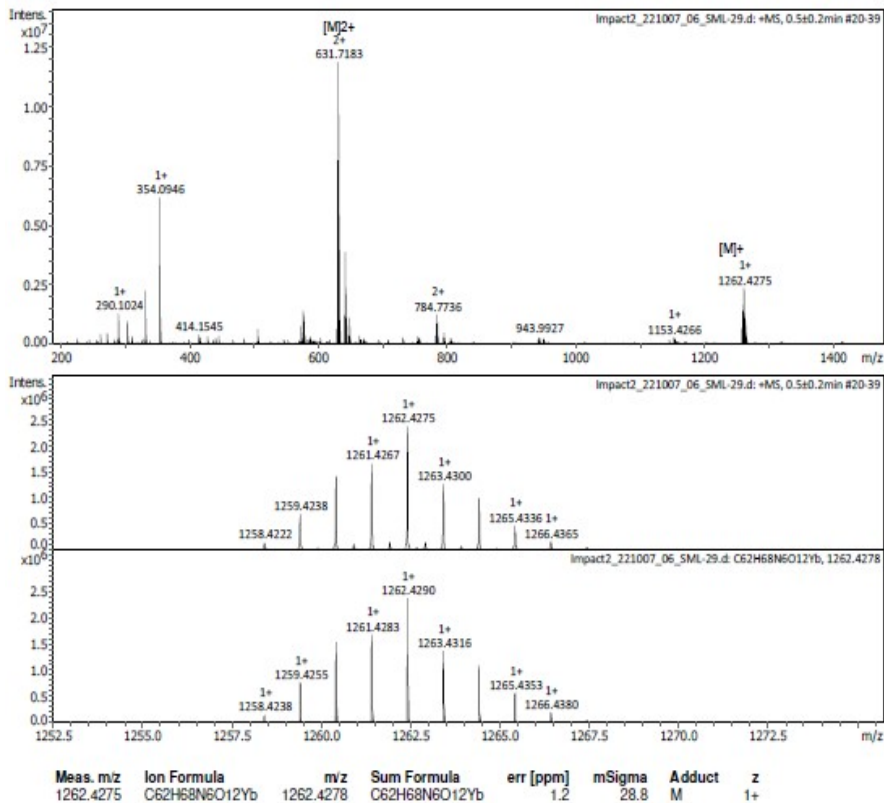

**Figure S1.** HPLC trace of **1** (*R,R*) (the one of the (*S,S*) enantiomer is superimposable),  $t_R = 12.40$  min., C-18 column, mobile phase: gradient from 15% to 100% of acetonitrile in 0.25 M ammonium formate water solution (up); HR-MS spectra of (*S,S*)-[YbL]Cl (middle) and (*R,R*)-[YbL]Cl (bottom) complexes.

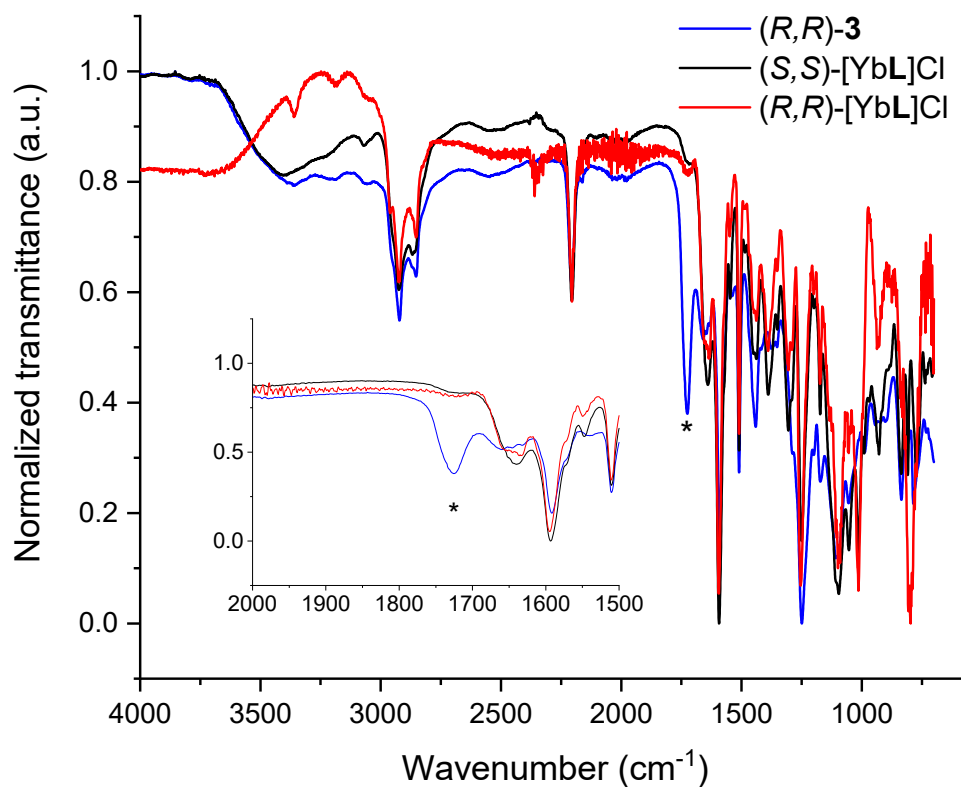

**Figure S2.** Overlap of FT-IR spectra of both the enantiomers of [YbL]Cl complex and the ligand (R,R)-1, with enlarged region of C=O vibrations.

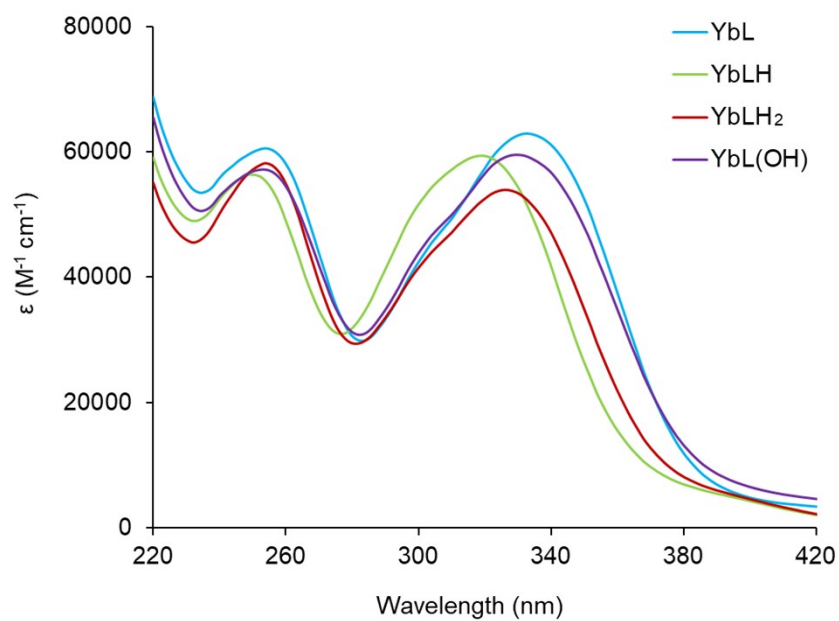

**Figure S3.** Molar absorbances of the Yb(III) species in Table 1 calculated by fitting the experimental titration data.

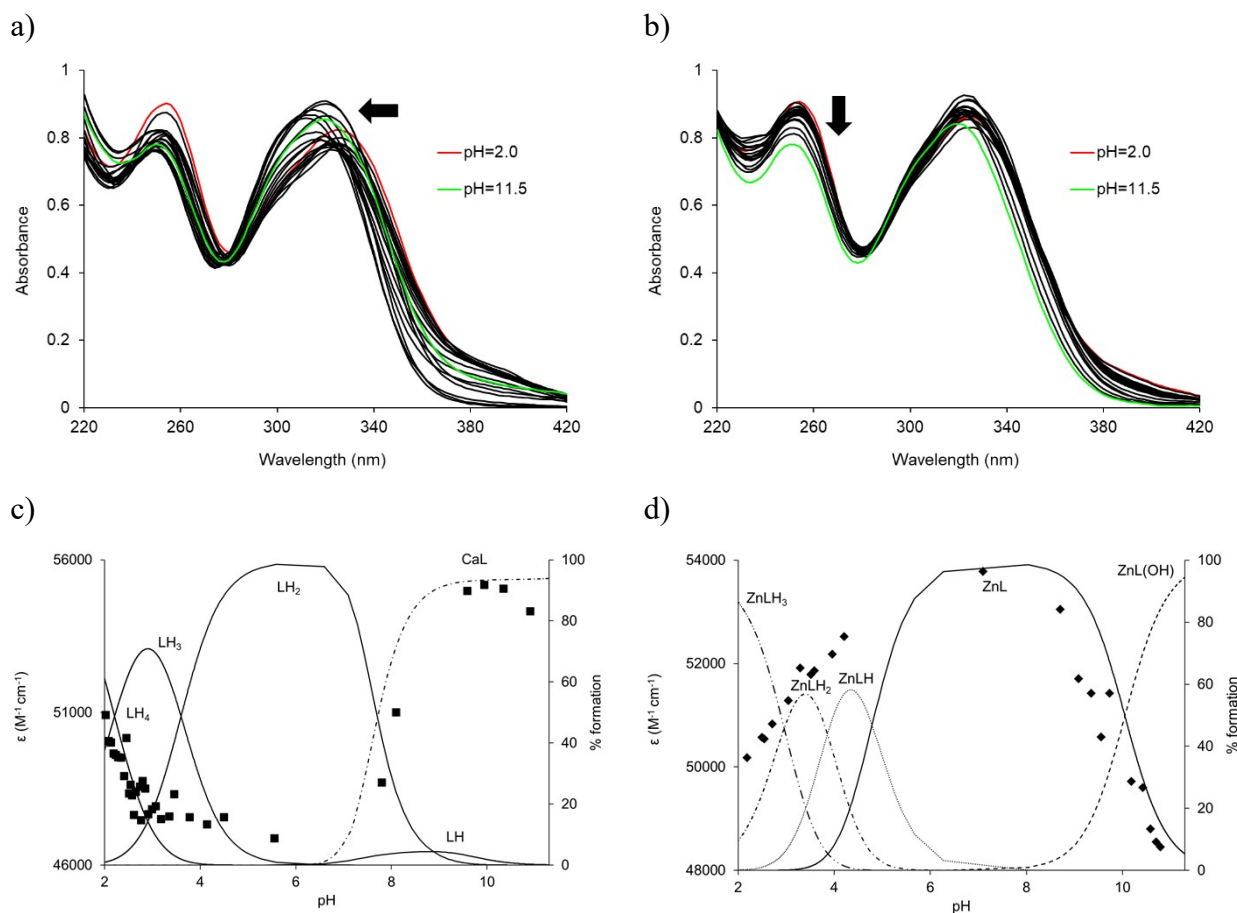

**Figure S4.** UV-vis absorption spectra changes during the acid-base titration of the ligand L (0.016 mM) in presence of an equimolar quantity of Ca(II) (a) and Zn(II) (b); (c) evolution of the molar absorptance ( $\epsilon$ ) at  $\lambda = 332$  nm during the titration of Ca(II) (■) and Zn(II) (◆) respectively. Species distribution relative to the total metal in solution calculated on the basis of the equilibrium constants in Table 1.

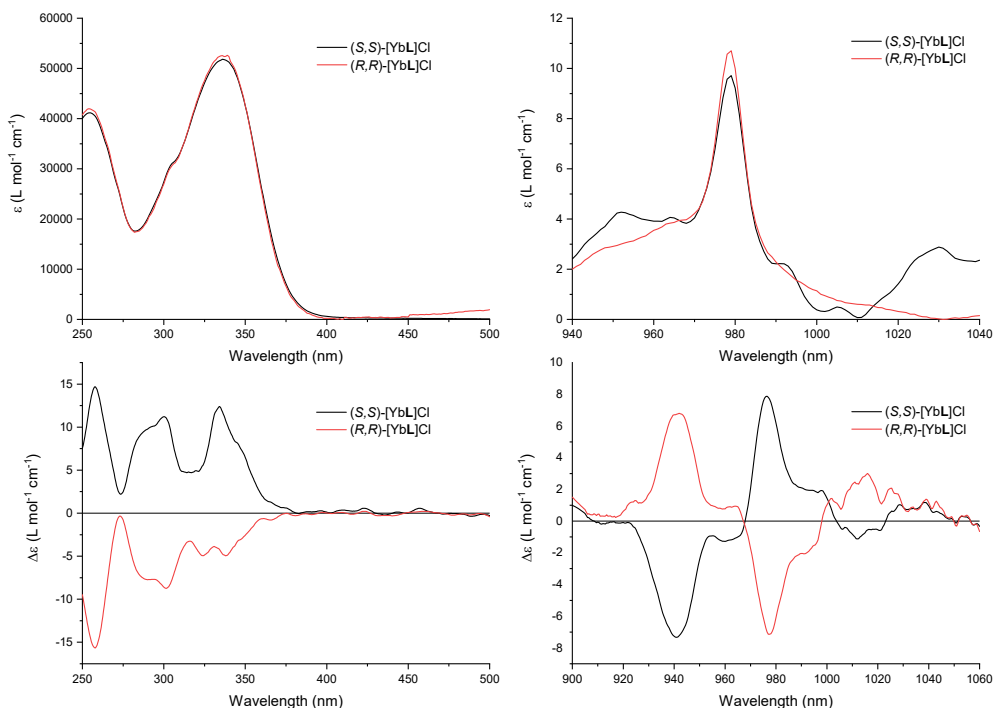

**Figure S5.** Room temperature absorption spectra of both the enantiomers of [YbL]Cl in the UV-Vis range ( $10^{-6}$  M methanol solution) (up, left) and in the IR range (1.5 M methanol solution) (up, right) and their ECD spectra in the UV-Vis range ( $10^{-5}$  M methanol solution) (bottom, left) and in the IR range (1.5 M methanol solution) (bottom, right).

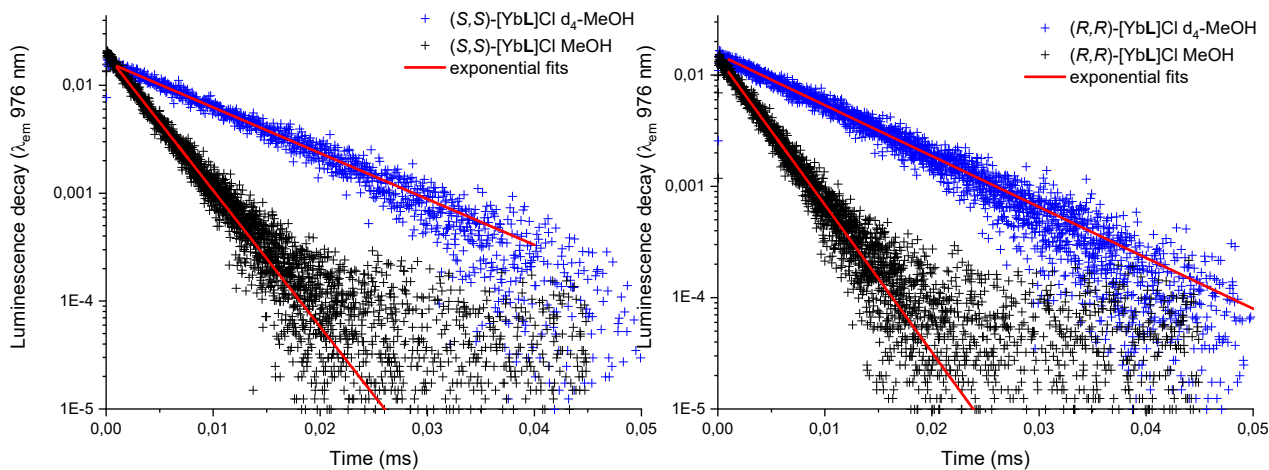

**Figure S6.** Luminescence decay of both enantiomers of [YbL]Cl in methanol and deuterated methanol. Excitation at 336 nm.
